# Supplementary figures and images for: Analysis of the molecular nature associated with microsatellite status in colon cancer identifies clinical implications for immunotherapy
Source: PubMed Central journal article supplement — J Immunother Cancer. 2020 Oct 7;8(2):e001437. doi: 10.1136/jitc-2020-001437 (PMC7542666; doi:10.1136/jitc-2020-001437), 2020-10-07

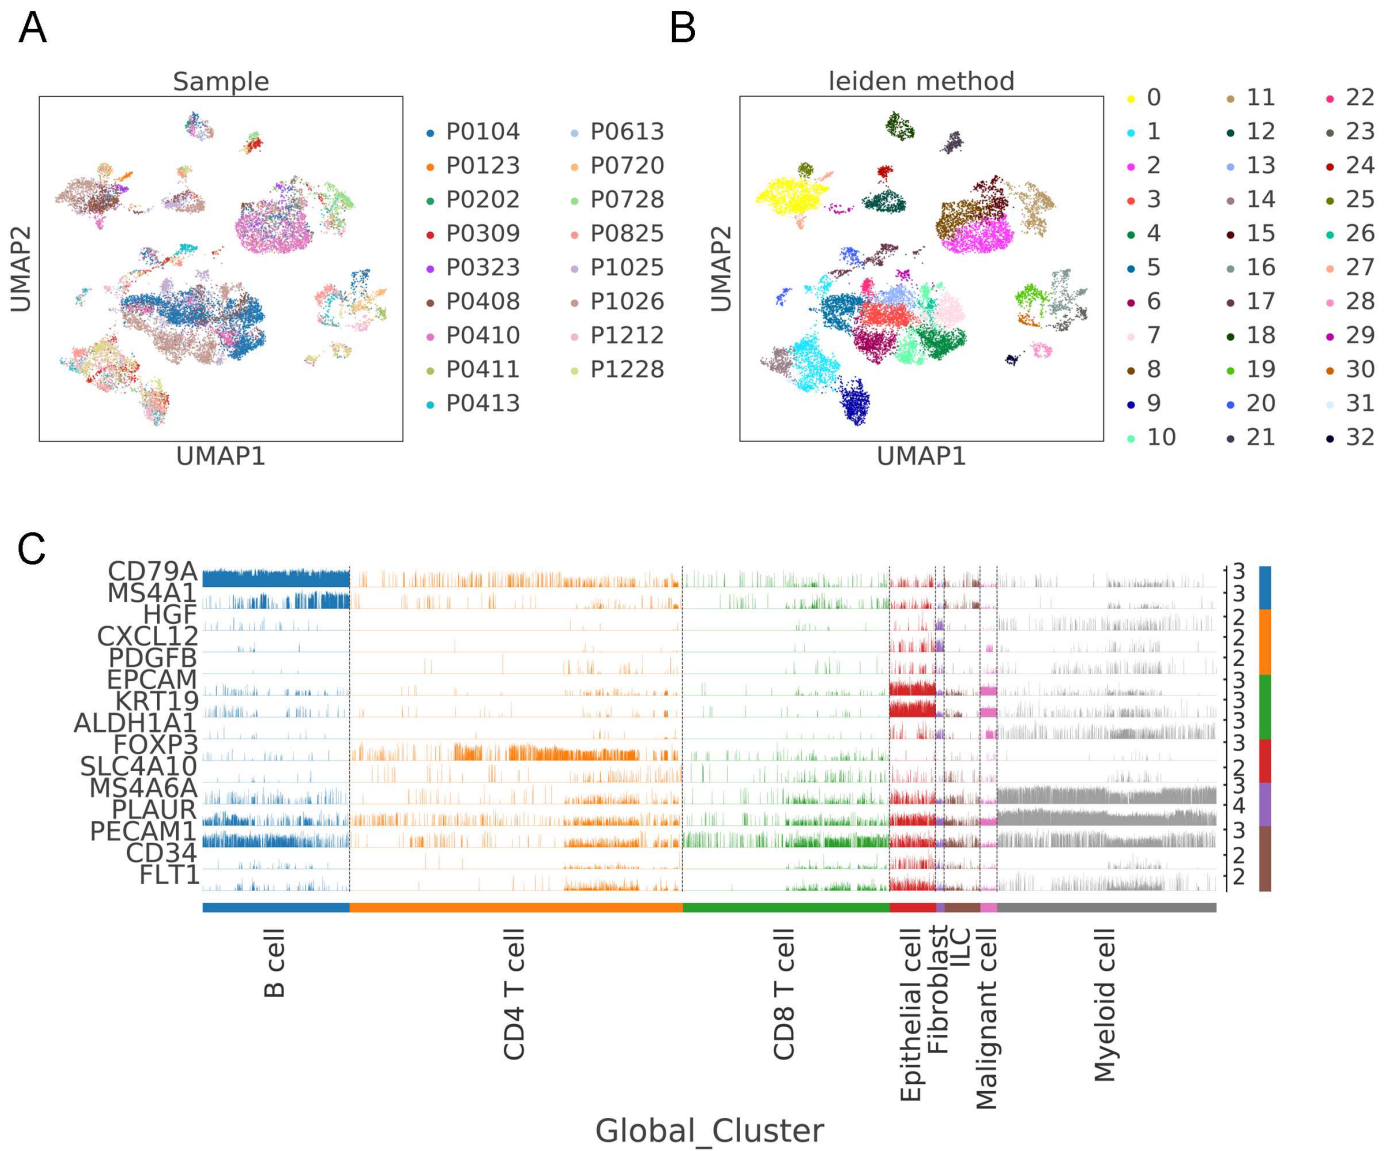

Supplement: jitc-2020-001437supp002.pdf [file jitc-2020-001437supp002.pdf]

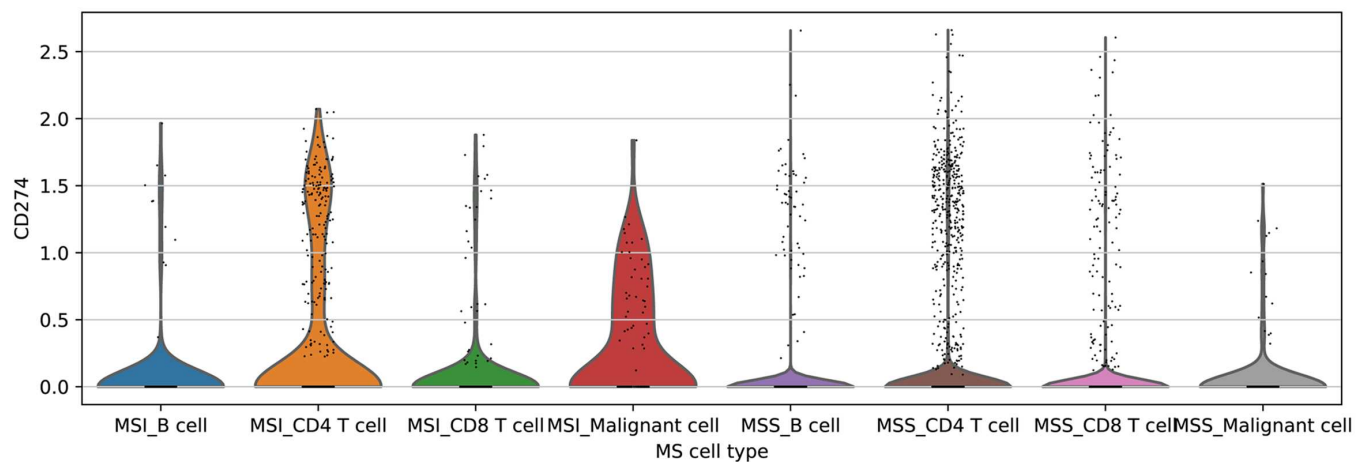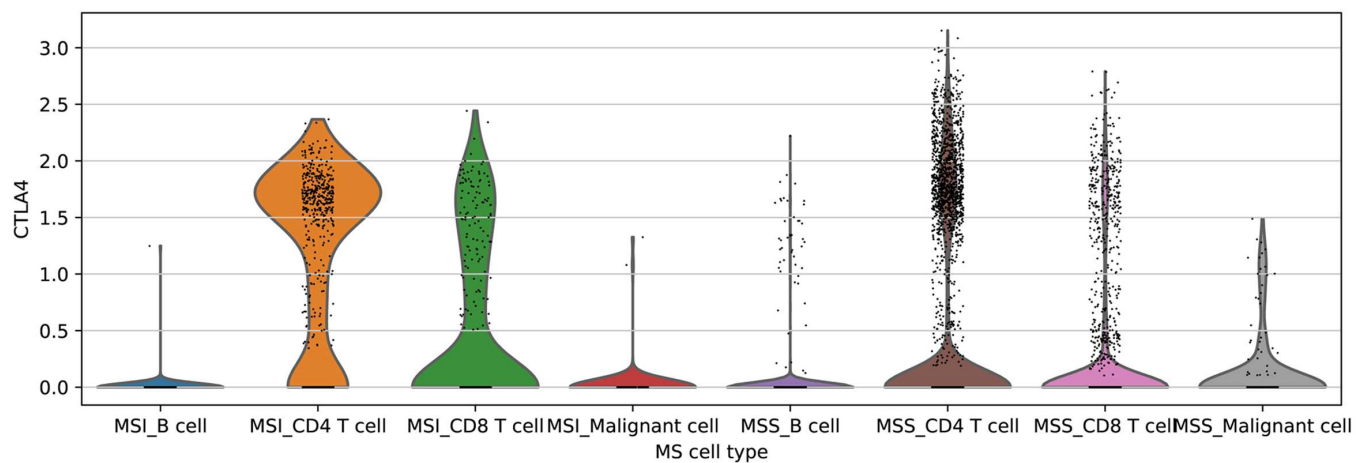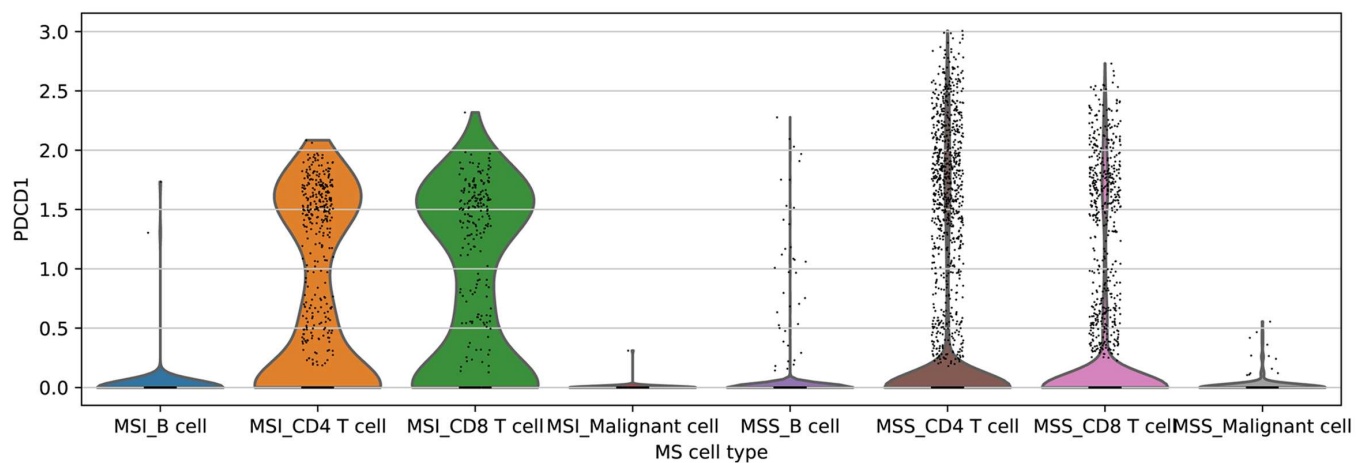

Supplement: jitc-2020-001437supp003.pdf [file jitc-2020-001437supp003.pdf]

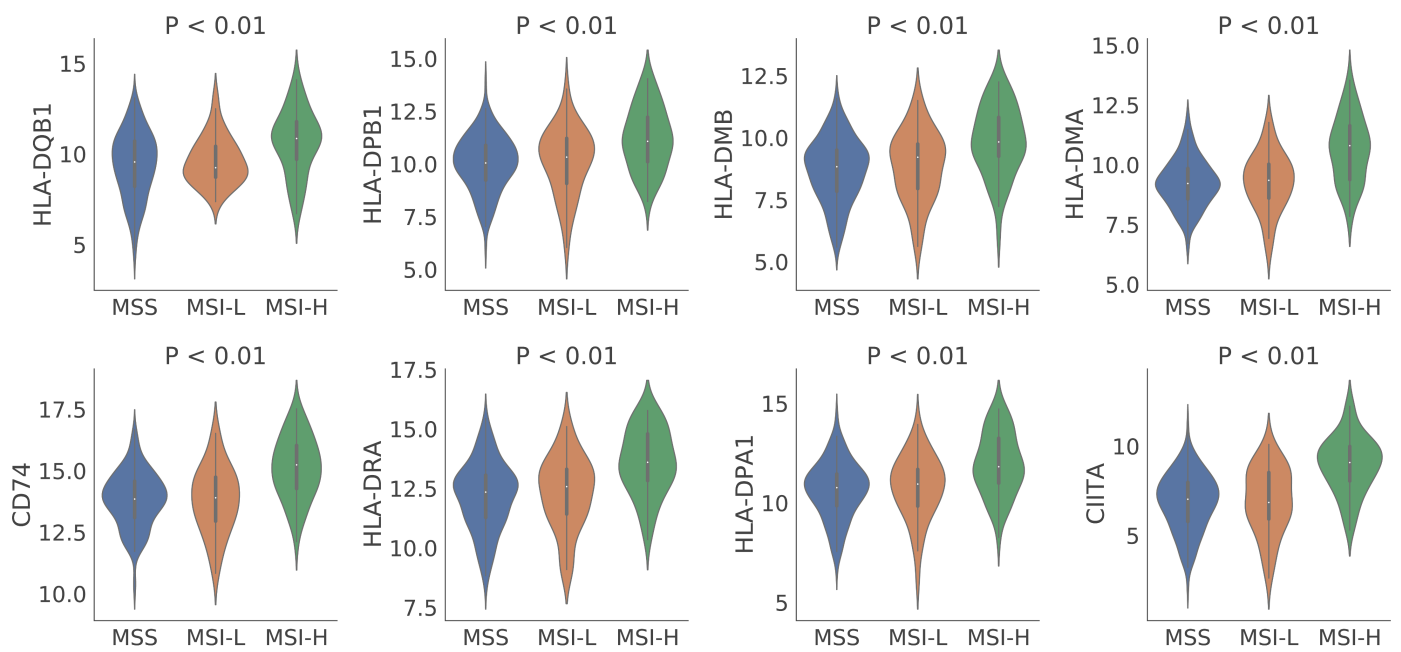

Supplement: jitc-2020-001437supp004.pdf [file jitc-2020-001437supp004.pdf]

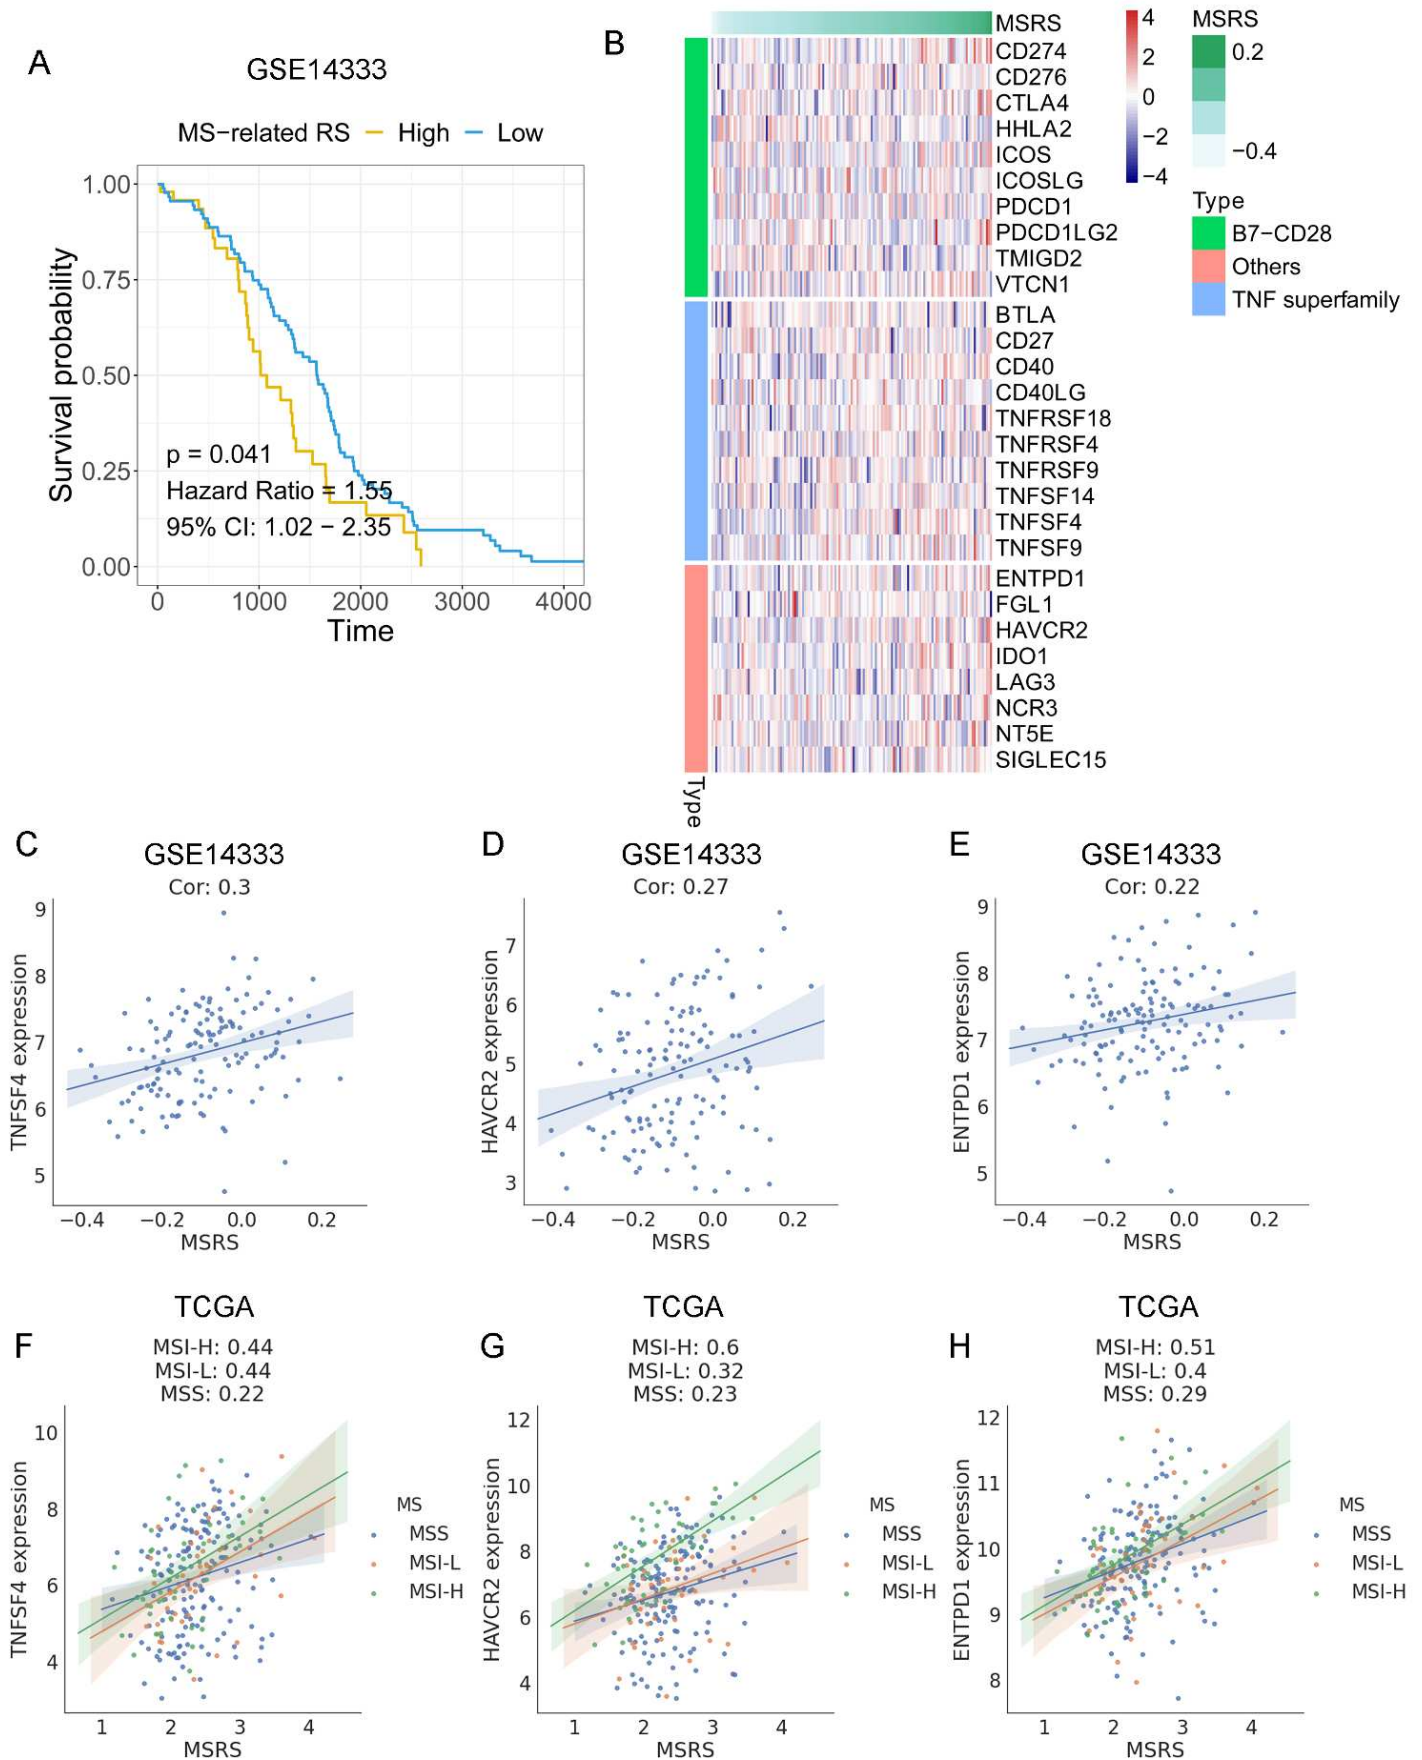

Supplement: jitc-2020-001437supp006.pdf [file jitc-2020-001437supp006.pdf]

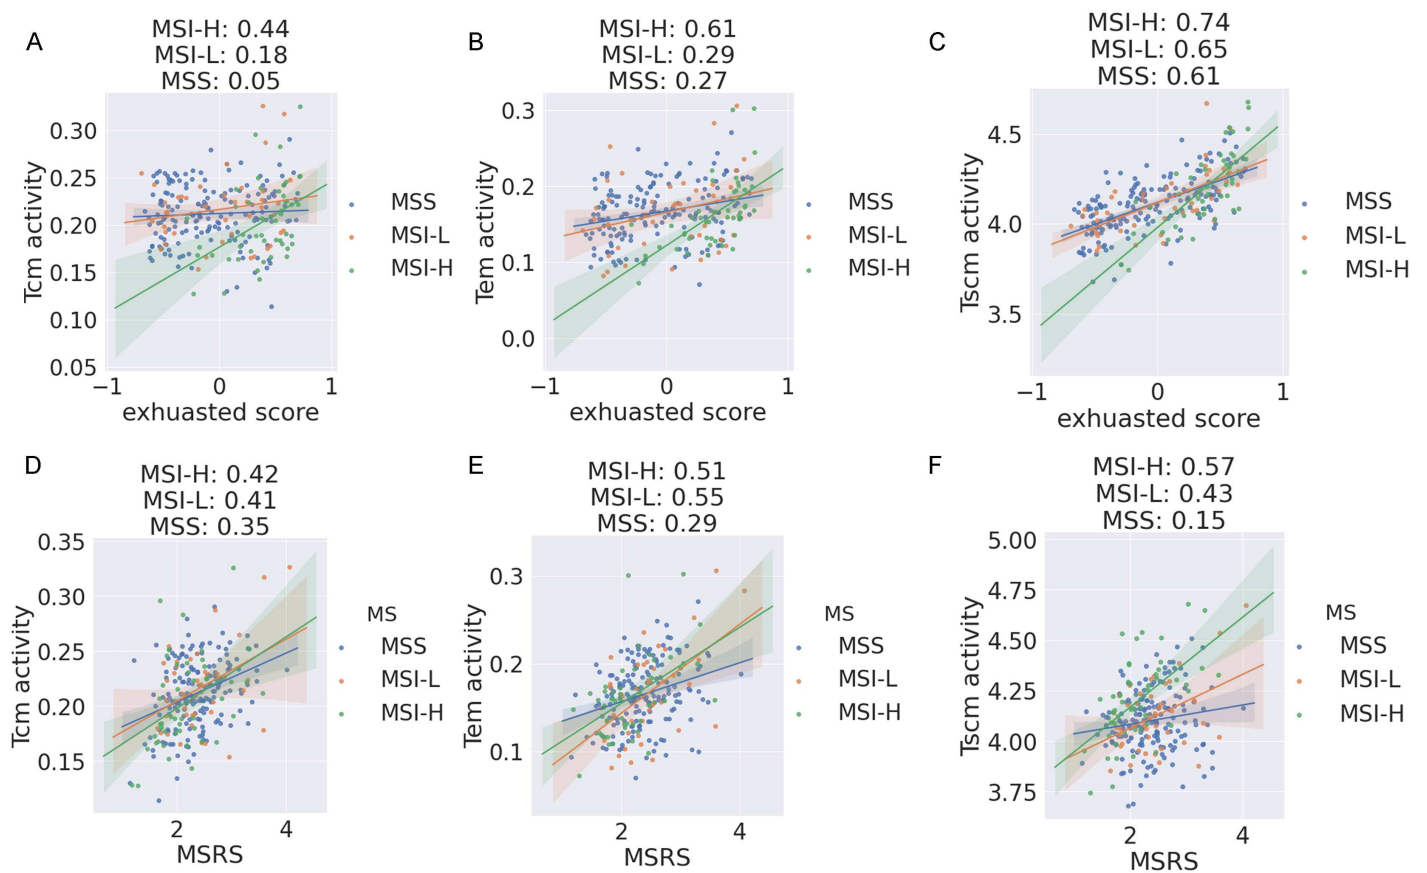

Supplement: jitc-2020-001437supp007.pdf [file jitc-2020-001437supp007.pdf]

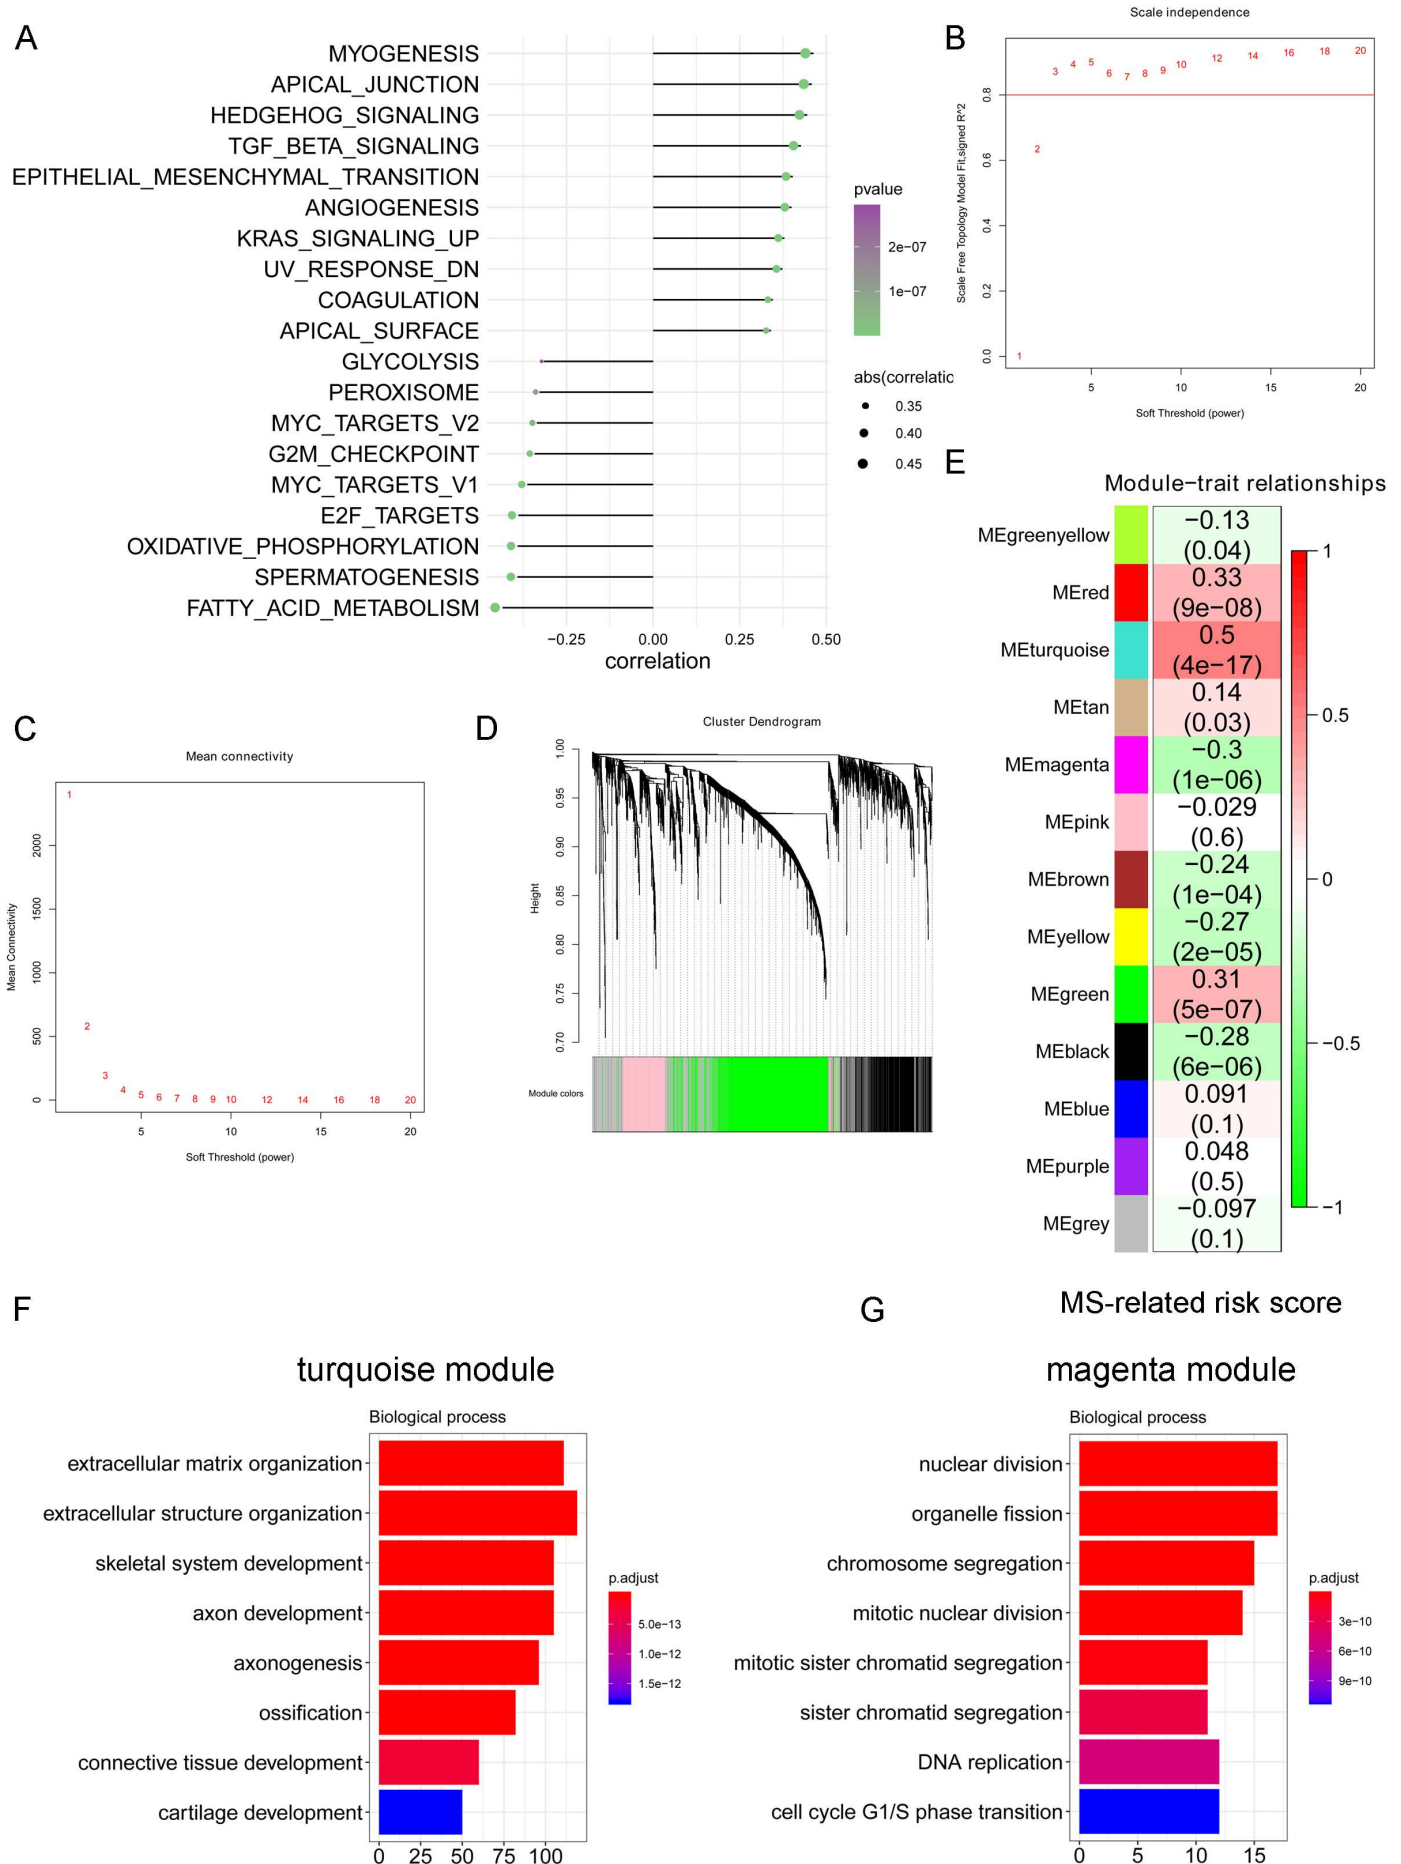

Supplement: jitc-2020-001437supp008.pdf [file jitc-2020-001437supp008.pdf]

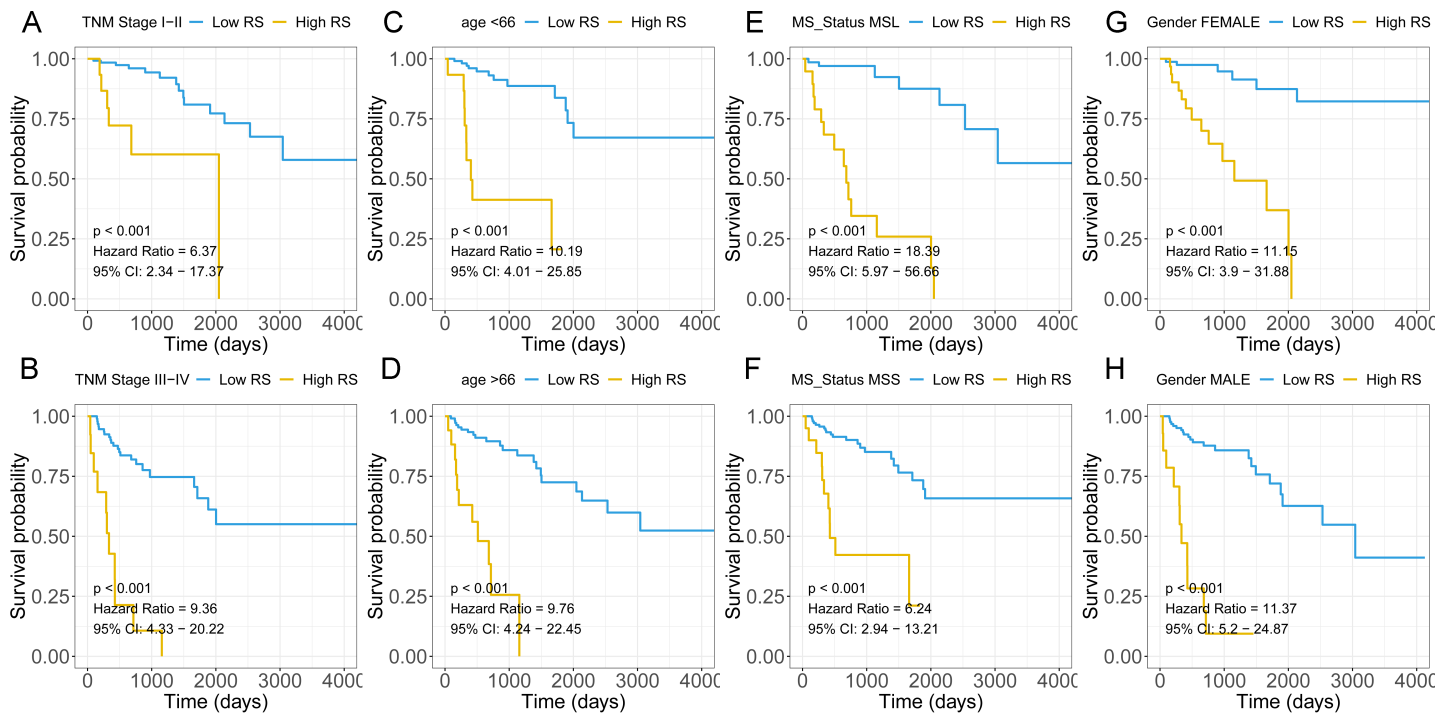

Supplement: jitc-2020-001437supp009.pdf [file jitc-2020-001437supp009.pdf]

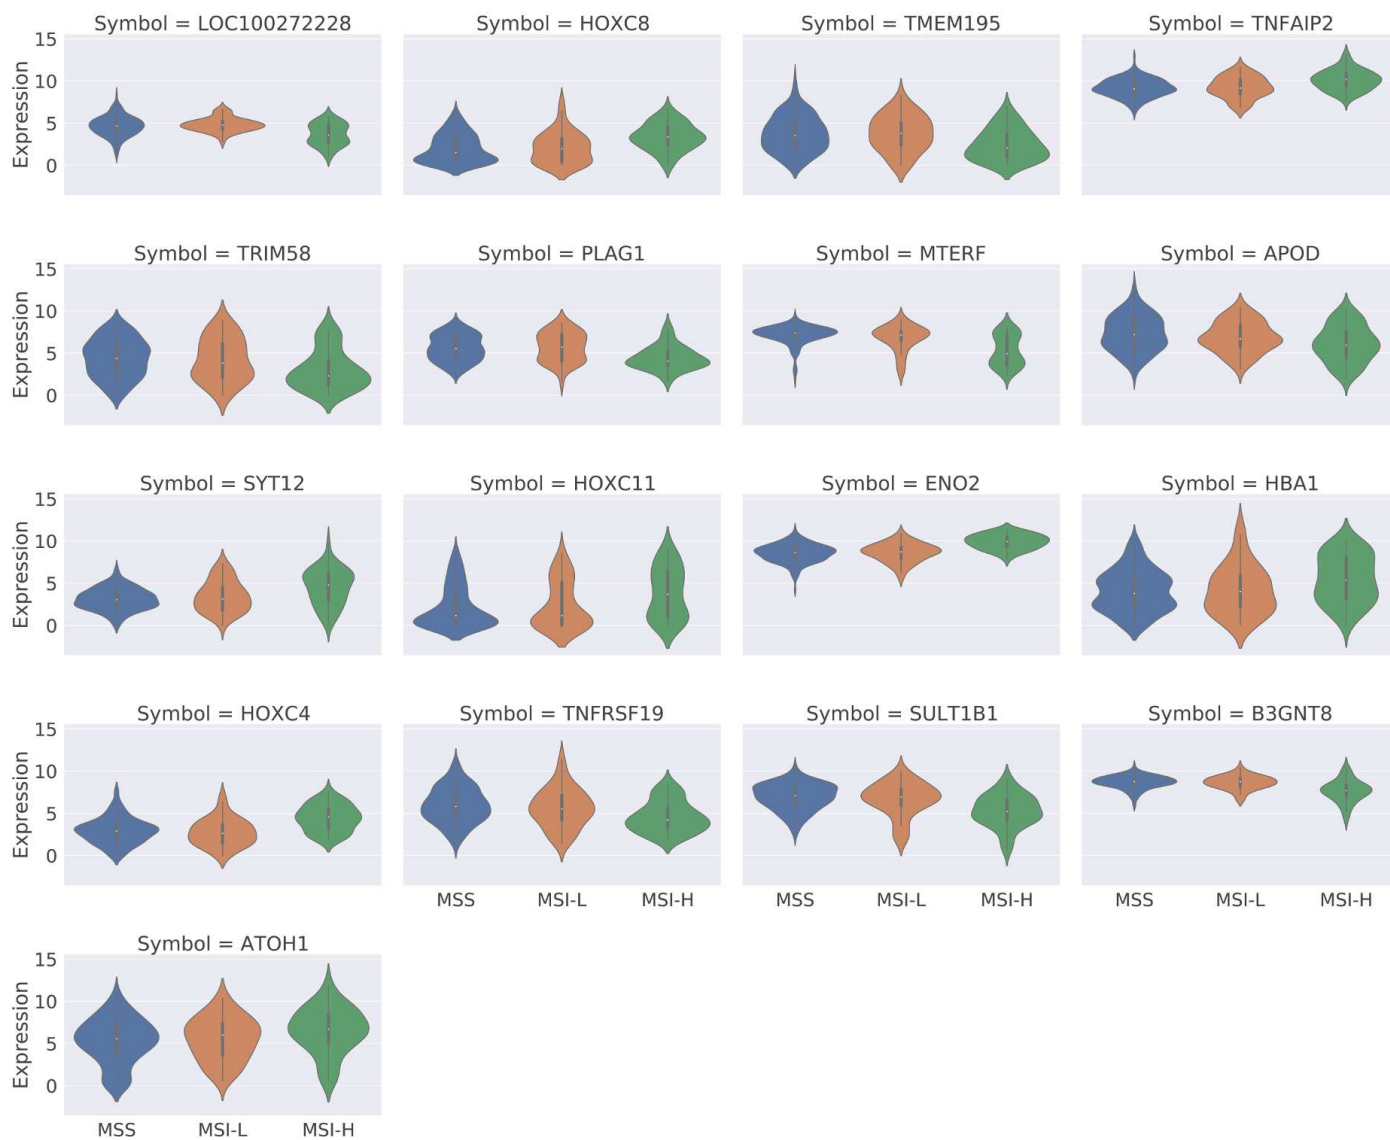

Supplement: jitc-2020-001437supp010.pdf [file jitc-2020-001437supp010.pdf]

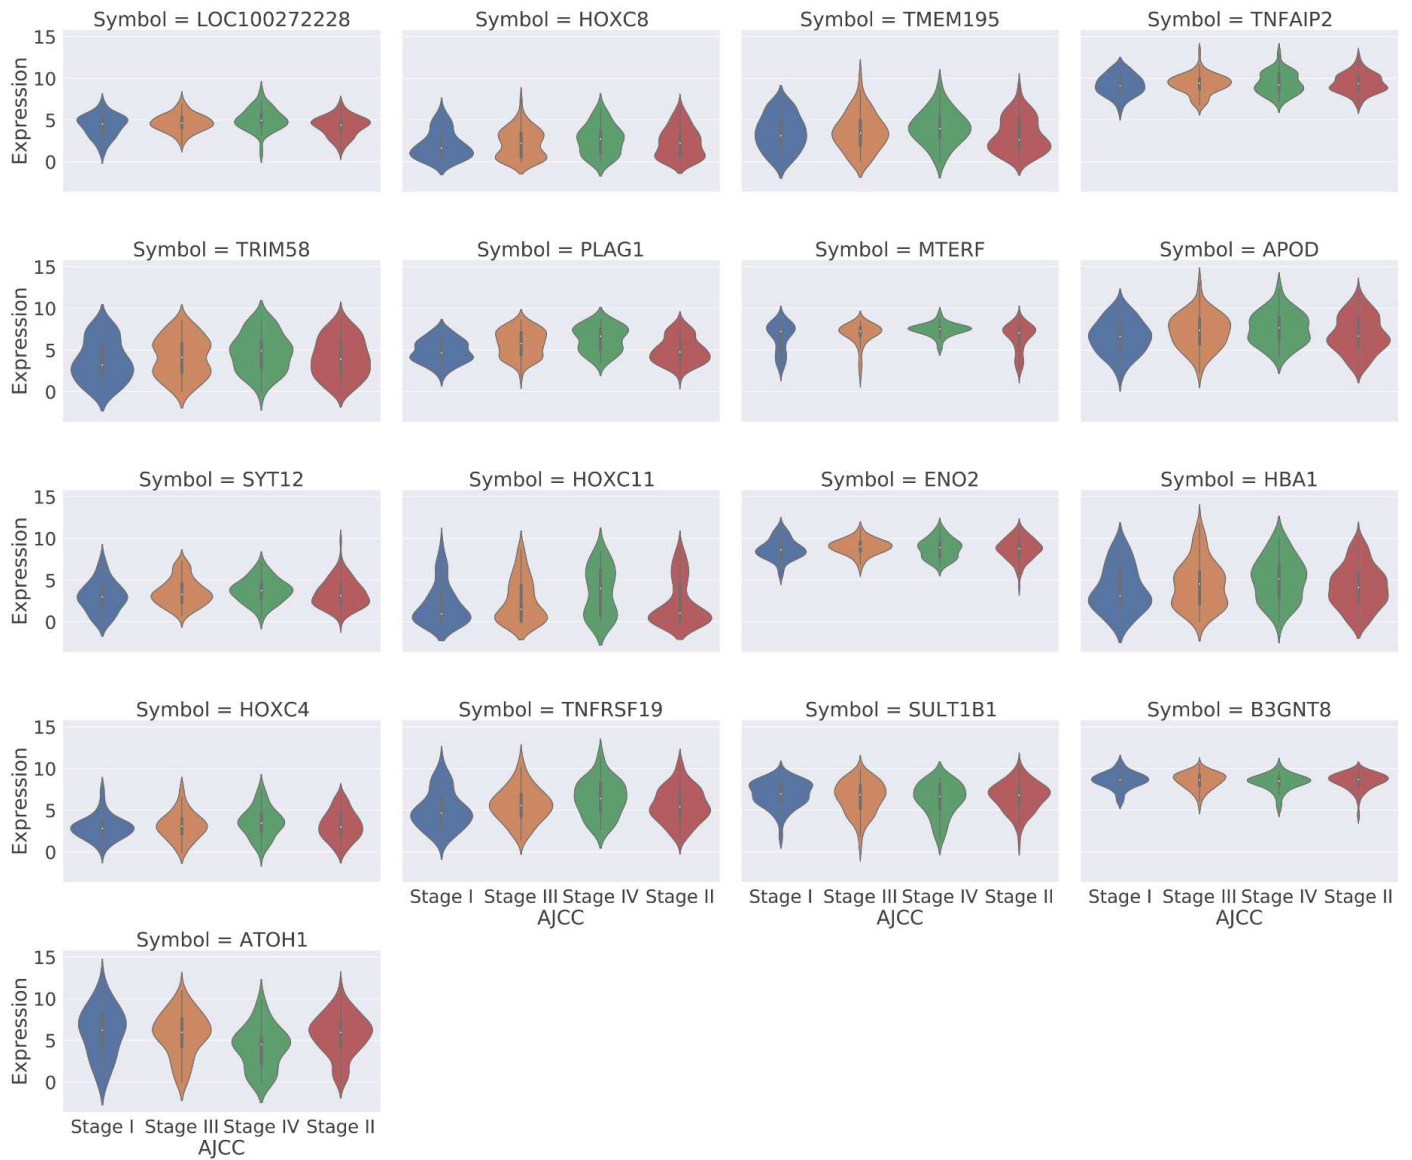

Supplement: jitc-2020-001437supp011.pdf [file jitc-2020-001437supp011.pdf]
